# Supplementary material for: Competing in Hot Conditions at the Tokyo Olympic Games: Preparation Strategies Used by Australian Race Walkers
Source: Frontiers journal article supplement (doi:10.3389/fphys.2022.836858), 2022-03-23
Supplement: Table_1.pdf [file Table_1.pdf]

**SUPPLEMENTARY TABLE 1** | Example of training performed during the team holding camp ( $n = 1$ ; female).

|                                                                                   | Monday           | Tuesday                                                     | Wednesday                             | Thursday                                       | Friday                                     | Saturday                                                    | Sunday                                |
|-----------------------------------------------------------------------------------|------------------|-------------------------------------------------------------|---------------------------------------|------------------------------------------------|--------------------------------------------|-------------------------------------------------------------|---------------------------------------|
| <b>WEEK -4 Pre-Olympic Games; Volume = 110km; 15.8% &gt; 4mmol·L<sup>-1</sup></b> |                  |                                                             |                                       |                                                |                                            |                                                             |                                       |
| <b>AM</b>                                                                         | Travel to Cairns | 10km Walk<br>5:11min·km <sup>-1</sup>                       | Lab Testing                           | Easy 6km Run + Gym<br>4:47min·km <sup>-1</sup> | Easy 12km Walk<br>5:07min·km <sup>-1</sup> | Easy 12km Walk +<br>30min Sauna<br>5:08min·km <sup>-1</sup> | 20km Walk<br>4:58min·km <sup>-1</sup> |
| <b>PM</b>                                                                         |                  | Easy Run<br>4:52min·km <sup>-1</sup>                        | 10km Walk<br>5:14min·km <sup>-1</sup> |                                                | Repetitions:<br>8x1609m*                   |                                                             | Repetitions:<br>10x300m               |
| <b>WEEK -3 Pre-Olympic Games; Volume = 125km; 17.9% &gt; 4mmol·L<sup>-1</sup></b> |                  |                                                             |                                       |                                                |                                            |                                                             |                                       |
| <b>AM</b>                                                                         | Easy Run + Gym   | Easy 12km Walk +<br>30min Sauna<br>5:07min·km <sup>-1</sup> | 22km Walk<br>4:52min·km <sup>-1</sup> | Gym                                            | Easy 8km Walk<br>5:09min·km <sup>-1</sup>  | Easy Walk + Sauna                                           | 24km Walk<br>4:56min·km <sup>-1</sup> |
| <b>PM</b>                                                                         |                  | 2x8x400m<br>3:45min·km <sup>-1</sup>                        | Easy Run + Sauna                      |                                                | Repetitions:<br>10x1200m*                  |                                                             | Repetitions:<br>10x400m               |
| <b>WEEK -2 Pre-Olympic Games; Volume = 72km; 16.7% &gt; 4mmol·L<sup>-1</sup></b>  |                  |                                                             |                                       |                                                |                                            |                                                             |                                       |
| <b>AM</b>                                                                         | 6km Run + Gym    | Warm-up                                                     | Easy 12-20km Walk                     | Gym                                            | Warm-up                                    | Travel to Sapporo                                           | Warm-up                               |
| <b>PM</b>                                                                         |                  | Repetitions:<br>10x1km (4:10)                               | 8km (Walk/Run)                        |                                                | Travel to Sydney                           | Light Training                                              | Easy 6-8km Walk                       |

\*Hyperhydration trial.
