# Supplementary material for: Competing in Hot Conditions at the Tokyo Olympic Games: Preparation Strategies Used by Australian Race Walkers
Source: Frontiers journal article supplement (doi:10.3389/fphys.2022.836858), 2022-03-23
Supplement: Table_2.pdf [file Table_2.pdf]

**SUPPLEMENTARY TABLE 2** | Example of training performed during the team holding camp ( $n = 1$ ; male).

|                                                                                   | Monday                | Tuesday                                            | Wednesday                                 | Thursday                                  | Friday                                     | Saturday                                   | Sunday                                    |
|-----------------------------------------------------------------------------------|-----------------------|----------------------------------------------------|-------------------------------------------|-------------------------------------------|--------------------------------------------|--------------------------------------------|-------------------------------------------|
| <b>WEEK -3 Pre-Olympic Games; Volume = 110km; 16.2% &gt; 4mmol·L<sup>-1</sup></b> |                       |                                                    |                                           |                                           |                                            |                                            |                                           |
| <b>AM</b>                                                                         | Travel to Cairns      | Easy 10km Walk                                     | Lab Testing                               | Easy 8km Walk<br>5:01min·km <sup>-1</sup> | Easy 12km Walk<br>5:09min·km <sup>-1</sup> | Easy 12km Walk<br>5:10min·km <sup>-1</sup> | 33km Walk<br>4:56min·km <sup>-1</sup>     |
| <b>PM</b>                                                                         | Gym                   |                                                    | Easy 8km Walk<br>5:01min·km <sup>-1</sup> |                                           | Repetitions <sup>†</sup><br>8x1609m        |                                            | Repetitions:<br>10x300m                   |
| <b>WEEK -2 Pre-Olympic Games; Volume = 120km; 18.7% &gt; 4mmol·L<sup>-1</sup></b> |                       |                                                    |                                           |                                           |                                            |                                            |                                           |
| <b>AM</b>                                                                         | Easy 6km Run +<br>Gym | 15km Walk <sup>†</sup><br>5:04min·km <sup>-1</sup> | 22km Walk<br>4:50min·km <sup>-1</sup>     | Gym                                       | Easy 8km Walk<br>5:08min·km <sup>-1</sup>  | Easy 12km Walk<br>5:16min·km <sup>-1</sup> | 25km Walk<br>4:48min·km <sup>-1</sup>     |
| <b>PM</b>                                                                         |                       | Repetitions:<br>2x8x400m                           | Easy 9km Run<br>4:56min·km <sup>-1</sup>  |                                           | Repetitions <sup>†</sup><br>10x1200m       |                                            | Repetitions:<br>10x400m                   |
| <b>WEEK -1 Pre-Olympic Games; Volume = 72km; 23.6% &gt; 4mmol·L<sup>-1</sup></b>  |                       |                                                    |                                           |                                           |                                            |                                            |                                           |
| <b>AM</b>                                                                         | Rest Day              | 15km Walk<br>4:27min·km <sup>-1</sup>              | 18km Walk<br>4:58min·km <sup>-1</sup>     | 6km Run + Gym<br>4:16min·km <sup>-1</sup> | Warm-up                                    | Travel to Sapporo                          | Warm-up                                   |
| <b>PM</b>                                                                         |                       | 5km Run<br>4:25min·km <sup>-1</sup>                | Easy 7km Run<br>4:16min·km <sup>-1</sup>  |                                           | Travel to Sydney                           | Easy 6km Walk<br>5:01min·km <sup>-1</sup>  | Easy 5km Walk<br>5:07min·km <sup>-1</sup> |

\*Hyperhydration trial. †Pre-cooling trial
